# Supplementary material
Source: PubMed Central journal article supplement (PMC7659553)
Supplement: mmc1.pdf [file mmc1.pdf]

**Cell Reports Medicine, Volume 1**

**Supplemental Information**

**Repression of LKB1 by *miR-17~92* Sensitizes**

***MYC*-Dependent Lymphoma to Biguanide Treatment**

**Said Izreig, Alexandra Gariepy, Irem Kaymak, Hannah R. Bridges, Ariel O. Donayo, Gaëlle Bridon, Lisa M. DeCamp, Susan M. Kitchen-Goosen, Daina Avizonis, Ryan D. Sheldon, Rob C. Laister, Mark D. Minden, Nathalie A. Johnson, Thomas F. Duchaine, Marc S. Rudoltz, Sanghee Yoo, Michael N. Pollak, Kelsey S. Williams, and Russell G. Jones**

## Supplemental Information

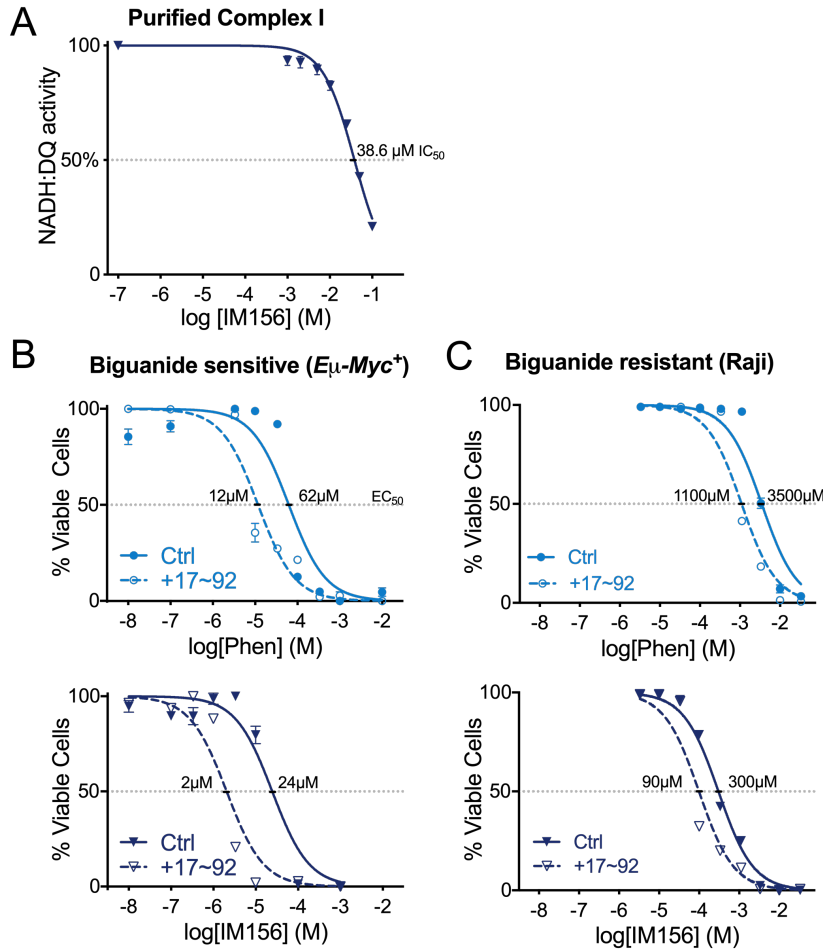

**Fig. S1, related to Fig. 2. *miR-17~92* sensitizes lymphoma cells to apoptosis by biguanides**

**(A)** NADH:decylubiquinone (DQ) oxidoreduction by purified complex I (isolated from bovine mitochondria) was measured in the presence of the indicated concentrations of IM156.

Data represent mean  $\pm$  SEM for technical replicates (n = 3 per concentration).

**(B-C)** Viability of biguanide sensitive *Eμ-Myc*<sup>+</sup> lymphoma cells (A) or biguanide-resistant Raji cells (B) expressing control (Ctrl, closed circle/solid) or *miR-17~92* (+17~92, open circle/dashed) vectors following 48 h treatment with indicated doses of phenformin (top) or IM156 (bottom). EC<sub>50</sub> for each compound is indicated. Data represent mean  $\pm$  SEM for biological replicates (n = 3 per drug per concentration).

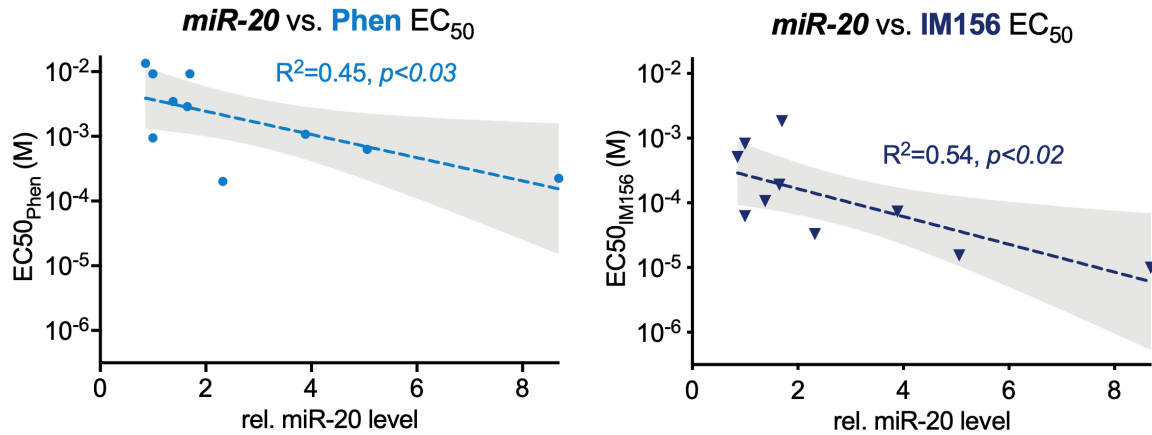

**Fig. S2, related to Fig. 6. *miR-17/20* expression correlates with biguanide sensitivity in human lymphoma cells.** EC<sub>50</sub> for phenformin (Phen, left) and IM156 (right) correlated to the relative levels of mature miR-20 transcript for ten human lymphoma cell lines (n = 3 per sample). Linear regression (dotted line) is shown for both drugs with shaded 95% confidence interval.

**Table S1, related to Fig. 6. EC<sub>50</sub> and *miR17/20* expression in human lymphoma cell lines**

|                    | Relative expression |        |        | EC <sub>50</sub> |             |
|--------------------|---------------------|--------|--------|------------------|-------------|
|                    | pri-miR-17          | miR-17 | miR-20 | Phen             | IM156       |
| <i>SU-DHL-4</i>    | 1                   | 1      | 1      | 0.009283         | 0.0008229   |
| <i>OCI-Ly-7</i>    | 8.49                | 1.47   | 2.32   | 0.0002009        | 0.00003293  |
| <i>Jeko-1</i>      | 6.10                | 1.63   | 3.89   | 0.001075         | 0.00007331  |
| <i>Rec-1</i>       | 11.08               | 2.04   | 5.06   | 0.0006291        | 0.00001547  |
| <i>Karpas 1718</i> | 12.69               | 4.21   | 8.69   | 0.0002254        | 0.000009992 |
| <i>OCI-Ly-1</i>    | 1.07                | 1.05   | 1.38   | 0.003448         | 0.0001068   |
| <i>OCI-Ly-2</i>    | 1.58                | 1.17   | 1.65   | 0.002892         | 0.00019     |
| <i>OCI-Ly-3</i>    | 1.29                | 1.7    | 1      | 0.0009506        | 0.00006248  |
| <i>OCI-Ly-8</i>    | 1.81                | 1.11   | 1.7    | 0.009283         | 0.001828    |
| <i>OCI-Ly-18</i>   | 0.43                | 0.7    | 0.86   | 0.01349          | 0.0005098   |
